# Supplementary material for: Atmospheric Black Carbon Loadings and Sources over Eastern Sub-Saharan Africa Are Governed by the Regional Savanna Fires
Source: PubMed Central journal article supplement (PMC9670846; doi:10.1021/acs.est.2c05837), 2022-10-30
Supplement: es2c05837_si_001.pdf [file es2c05837_si_001.pdf]

1 **Supporting Information**

2 **Atmospheric Black Carbon Loadings and Sources over Eastern Sub-**  
3 **Saharan Africa are Governed by the Regional Savanna Fires**

4 Leonard Kirago<sup>1,2</sup>, Örjan Gustafsson<sup>1,2</sup>, Samuel M. Gaita<sup>1,2</sup>, Sophie L. Haslett<sup>1,2</sup>, H. Langley  
5 deWitt<sup>3,a</sup>, Jimmy Gasore<sup>3,4,5</sup>, Katherine E. Potter<sup>3,b</sup>, Ronald G. Prinn<sup>3</sup>, Maheswar Rupakheti<sup>6</sup>,  
6 Jean de Dieu Ndikubwimana<sup>4</sup>, Bonfils Safari<sup>5</sup>, and August Andersson<sup>1,2\*</sup>.

7  
8 <sup>1</sup>Department of Environmental Science, Stockholm University, 10691 Stockholm, Sweden

9 <sup>2</sup>Bolin Centre for Climate Research, Stockholm University, 10691 Stockholm, Sweden

10 <sup>3</sup>Center for Global Change Science, Massachusetts Institute of Technology, 54-1312  
11 Cambridge, Massachusetts, USA

12 <sup>4</sup>Climate Secretariat, Ministry of Education, 622 Kigali, Rwanda

13 <sup>5</sup>Physics Department, School of Physics, College of Science and Technology, University of  
14 Rwanda, 4285 Kigali, Rwanda

15 <sup>6</sup>Institute for Advanced Sustainability Studies (IASS), 14467 Potsdam, Germany

16 <sup>a</sup>now at: Cooperative Institute for Research in Environmental Sciences, University of Colorado  
17 at Boulder, 80309 Colorado, USA.

18 <sup>b</sup>now at: Boulder A.I.R. (Atmosphere Innovation Research) LLC, Boulder, 80305 Colorado,  
19 USA

20  
21 **\*Correspondence:** August Andersson ([august.r.andersson@gmail.com](mailto:august.r.andersson@gmail.com))

22  
23 **Supproting information includes: 18 pages; 3 Notes, 3 Tables, and 11 Figures.**

|    |                                                                                                          |    |
|----|----------------------------------------------------------------------------------------------------------|----|
| 24 | <b>Contents</b>                                                                                          |    |
| 25 | <b>Supporting Notes</b> .....                                                                            | 3  |
| 26 | SI Notes S1: Analysis of Aethalometer Data.....                                                          | 3  |
| 27 | SI Notes S2: Non-sea salt contribution to aerosol concentration .....                                    | 4  |
| 28 | SI Notes S3: Variability of the slope in linear regression.....                                          | 4  |
| 29 | <b>Supporting Tables</b> .....                                                                           | 5  |
| 30 | SI Table S1: Quality assurance data for analytical methods used. ....                                    | 5  |
| 31 | SI Table S2: Sensitivity analysis for inadvert inclusion of pyrolyzed carbon into EC fraction. 5         |    |
| 32 | SI Table S3: PM <sub>2.5</sub> aerosol composition, mass ratios, and dual carbon isotopes.....           | 6  |
| 33 | <b>Supporting Figures</b> .....                                                                          | 7  |
| 34 | SI Figure S1: BC loadings and sample selection for carbon isotopes analysis. ....                        | 7  |
| 35 | SI Figure S2: Hourly and weekly averaged equivalent BC data. ....                                        | 8  |
| 36 | SI Figure S3: Histograms of de-trended eBC showing a log-normal distribution.....                        | 9  |
| 37 | SI Figure S4: Seasonal changes in PM <sub>2.5</sub> aerosol composition at the RCO.....                  | 10 |
| 38 | SI Figure S5: Correlation between different PM <sub>2.5</sub> components at RCO. ....                    | 11 |
| 39 | SI Figure S6: Temporal trend of different mass ratios relative to BC in PM <sub>2.5</sub> aerosols ..... | 12 |
| 40 | SI Figure S7: Visualization of concentration-dependent geographical origins of BC.....                   | 13 |
| 41 | SI Figure S8: Dual-carbon isotope-based BC source attribution at RCO.....                                | 14 |
| 42 | SI Figure S9: The dual carbon isotope signatures of BC, and the respective keeling plots. ....           | 15 |
| 43 | SI Figure S10: Spike-detection of the hourly resolution eBC data.....                                    | 16 |
| 44 | SI Figure S11: Correlation between eBC estimates and thermo-optical BC data. ....                        | 17 |
| 45 | References.....                                                                                          | 18 |
| 46 |                                                                                                          |    |

## 47 **Supporting Notes**

48

### 49 **SI Notes S1: Analysis of Aethalometer Data**

50 High temporal resolution (hourly) equivalent BC (eBC) data was retrieved from an AE33  
51 aethalometer at 880nm (Magee Inc.). The 1 to 5 minutes resolution aethalometer data were  
52 binned into an hourly resolution format (median). Spikes in the hourly data were removed by  
53 the following sliding window algorithm: i) the mean ( $\mu$ ) and standard deviation ( $\sigma$ ) of four  
54 adjacent data points (i-2; i-1; i+1 and i+2) around data point i is calculated. ii) If the value at  
55 point i is higher than  $\mu + 7 \cdot \sigma$  (positive spike) or is lower than  $\mu - 7 \cdot \sigma$  (negative spike), then  
56 this data point is considered a spike and is removed (Figure S10). Also, data points with fewer  
57 than 2 adjacent data points were removed. Out of in total 30015 hourly data points, 187 were  
58 removed, corresponding to 4‰ (the number 7 was chosen such that less than 5‰ of the data  
59 should be removed). Positive spikes were over-represented during 6 - 7 PM, local time,  
60 suggesting influence by, e.g., evening cooking/heating.

61 The aethalometer estimates the BC concentrations by measuring the attenuation of light through  
62 a filter tape. Calculation of BC concentration estimates requires three transformations of the  
63 raw data: i) accounting for the non-linear light-attenuation in a filter; ii) correction for multiple  
64 scattering (MS) effects; iii) conversion of the correct light-attenuation signal (m-1) to BC  
65 concentrations ( $\mu\text{g m}^{-3}$ ) by a conversion factor (mass absorption cross-section, MAC). Here, we  
66 used the method of Drinovec et al.,<sup>1</sup> for these three steps. Both the MS and the MAC, in general,  
67 depend on the state of the particles, including a degree of internal/external mixing and/or  
68 interference between BC and other absorbing components, e.g., brown carbon. These effects  
69 have been shown to be highly site-specific. The MS may vary from  $\sim 2$  for fresh BC to up to  $\sim$   
70 6 for biomass burning influenced BC in the Amazon<sup>2,3</sup>, while the MAC may be enhanced by a  
71 factor of 2 or more due to coatings<sup>4</sup>. For practical purposes of estimating BC concentrations  
72 (as opposed to estimating light-absorption coefficients), the distinction between MAC and MS  
73 is less important, as we can consider an effective correction factor  $X = \text{MAC}/\text{MS}$ .

74 Given the site-specific dependency on the highly variable factor X, we here calibrate the BC  
75 estimates from the aethalometer against sunset laboratory thermo-optical measurement data.  
76 The hourly resolved aethalometer data was matched to the week-long (night-time only) filter  
77 collections. Linear regression of the 55 overlapping data points gives a correlation of  $R^2 = 0.83$   
78 ( $p \ll 0.01$ ), suggesting fair agreement (Figure S11). Overall, the BC concentrations were found  
79 to be over-estimated by a factor of 3.2 at 880nm. Similar offsets have been observed previously

80 for aged biomass burning plumes.<sup>5</sup> A possible explanation is enhancement due to mixing state  
81 in the aged air masses arriving at RCO.

82

### 83 **SI Notes S2: Non-sea salt contribution to aerosol concentration**

84 The non-sea-salt (nss) concentrations of  $K^+$  and  $SO_4^{2-}$  were calculated using  $Na^+$  as the sea-  
85 salt tracer<sup>6,7</sup>.

86 nss- $SO_4^{2-}$  is computed as follows:

$$87 \quad nss \ SO_4^{2-} = [SO_4^{2-}] - \left[ \left( \frac{[SO_4^{2-}]}{[Na^+]_{sea}} \right) * [Na^+] \right]$$

88 where  $([SO_4^{2-}]/[Na^+]_{sea})$  is the standard ratio of the concentrations of  $SO_4^{2-}$  and  $Na^+$  which is  
89 obtained from seawater composition.<sup>7</sup>

90

### 91 **SI Notes S3: Variability of the slope in linear regression**

92 Consider a linear regression of parameters x and y:

$$93 \quad y = \beta \cdot x + \alpha$$

94 Where,  $\beta$  is the fitted slope and  $\alpha$  is the fitted intercept. The variance (squared standard  
95 deviation,  $\sigma^2$ ) of the fitted slope may be calculated as:

$$96 \quad \sigma^2 = \frac{\sum_{i=1}^n (y_i - (\beta \cdot x_i + \alpha))^2}{(n - 2) \sum_{i=1}^n (x_i - \bar{x})^2}$$

97 Where, n is the number of data points and  $\bar{x}$  is the mean of x.

98

99

100 **Supporting Tables**

101

102 **SI Table S1:** Quality assurance data for analytical methods applied in this study. Method  
 103 detection limits (MDL = mean + 3\*SD of the blanks), field blank contribution, and  
 104 measurement precision were evaluated for BC, OC and water-soluble inorganics. Units in  $\mu\text{g}$   
 105  $\text{ml}^{-1}$  or  $\mu\text{g cm}^{-2}$ .

|                            | <b>BC</b> | <b>OC</b> | <b>SO<sub>4</sub><sup>2-</sup></b> | <b>NO<sub>3</sub><sup>-</sup></b> | <b>Cl<sup>-</sup></b> | <b>NH<sub>4</sub><sup>+</sup></b> | <b>Na<sup>+</sup></b> | <b>K<sup>+</sup></b> | <b>Ca<sup>2+</sup></b> | <b>Mg<sup>2+</sup></b> |
|----------------------------|-----------|-----------|------------------------------------|-----------------------------------|-----------------------|-----------------------------------|-----------------------|----------------------|------------------------|------------------------|
| Blank mean                 | < 0.02    | 0,45      | 0.13                               | 0.05                              | 0.06                  | 0.25                              | 0.04                  | 0.02                 | 0.08                   | 0.01                   |
| Method<br>Detection limit  | 0.02      | 1.12      | 0.23                               | 0.19                              | 0.08                  | 0.25                              | 0.12                  | 0.07                 | 0.12                   | 0.05                   |
| Mean Blank<br>contribution | N.D       | 4 %       | 2 %                                | 7 %                               | 48 %                  | 6 %                               | 14 %                  | 3 %                  | 66 %                   | 35 %                   |

106 *ND - not detected*

107

108 **SI Table S2:** Sensitivity analysis for inadvert inclusion of pyrolyzed carbon (PyrC) into the  
 109 cyro-trapped EC fraction. Based on Andersson et al. (2020), the  $\Delta^{14}\text{C}$  for PyrC (TC) at RCO  
 110 is estimated as +37‰ and  $\Delta^{14}\text{C}$ -BC at -32‰.

| <b>%PyrC in EC</b> | <b><math>\Delta^{14}\text{C}_{\text{BC}}^{\text{Obs}}</math> (‰)</b> | <b><math>\Delta^{14}\text{C}_{\text{OC}}^{\text{Obs}}</math> (‰)</b> | <b><math>\Delta^{14}\text{C}_{\text{BC}}^{\text{real}}</math> (‰)</b> | <b><math>f_{\text{bio}}^{\text{real}}</math> (%)</b> |
|--------------------|----------------------------------------------------------------------|----------------------------------------------------------------------|-----------------------------------------------------------------------|------------------------------------------------------|
| 0%                 | -32                                                                  | 37                                                                   | -32                                                                   | 0.92                                                 |
| 5%                 | -32                                                                  | 37                                                                   | -35                                                                   | 0.91                                                 |
| 10%                | -32                                                                  | 37                                                                   | -39                                                                   | 0.91                                                 |
| 20%                | -32                                                                  | 37                                                                   | -49                                                                   | 0.90                                                 |
| 30%                | -32                                                                  | 37                                                                   | -61                                                                   | 0.89                                                 |

112 **SI Table S3:** Seasonal averaged PM<sub>2.5</sub> aerosol composition (concentrations in  $\mu\text{g m}^{-3}$ ), mass ratios, and dual carbon isotopes ( $\delta^{13}\text{C}$  and  $\Delta^{14}\text{C}$ ; ‰)  
 113 at a sub-Saharan Africa regional background site, Rwanda Climate observatory. The June - August (JJA) and December to February (DJF) period  
 114 typically have dry weather.

|                     | OC        | EC        | NH <sub>4</sub> <sup>+</sup> | K <sup>+</sup> | SO <sub>4</sub> <sup>2-</sup> | NO <sub>3</sub> <sup>-</sup> | OC/BC   | NH <sub>4</sub> <sup>+</sup> /BC | SO <sub>4</sub> <sup>2-</sup> /BC | K <sup>+</sup> /BC | NO <sub>3</sub> <sup>-</sup> /BC | $\delta^{13}\text{C}$ | $\Delta^{14}\text{C}$ |
|---------------------|-----------|-----------|------------------------------|----------------|-------------------------------|------------------------------|---------|----------------------------------|-----------------------------------|--------------------|----------------------------------|-----------------------|-----------------------|
| <b>JJA, 2014</b>    | 7.9 ± 3.0 | 0.7 ± 0.4 | 1.1 ± 0.5                    | 0.8 ± 0.3      | 2.5 ± 1.2                     | 1.3 ± 0.7                    | 11 ± 3  | 1.7 ± 0.7                        | 3.8 ± 1.9                         | 1.2 ± 0.3          | 1.7 ± 0.6                        | -21.3 ± 0.8           | +3.3 ± 11             |
| <b>SON, 2014</b>    | 2.6 ± 1.1 | 0.2 ± 0.1 | 0.5 ± 0.3                    | 0.2 ± 0.1      | 1.3 ± 0.8                     | 0.2 ± 0.1                    | 12 ± 3  | 2.4 ± 0.9                        | 5.9 ± 2.5                         | 0.8 ± 0.2          | 0.5 ± 0.4                        |                       |                       |
| <b>JJA, 2015</b>    | 8.6 ± 2.8 | 1.1 ± 0.5 | 1.1 ± 0.4                    | 0.9 ± 0.3      | 2.2 ± 1.1                     | 1.5 ± 0.7                    | 9 ± 3.2 | 1.2 ± 0.9                        | 2.7 ± 2.7                         | 0.8 ± 0.2          | 1.3 ± 0.3                        | -20.8 ± 0.6           | -7.7 ± 29             |
| <b>SON, 2015</b>    | 2.5 ± 1.6 | 0.3 ± 0.2 | 0.4 ± 0.2                    | 0.2 ± 0.2      | 1.0 ± 0.6                     | 0.2 ± 0.2                    | 12 ± 4  | 1.8 ± 0.7                        | 4.8 ± 1.8                         | 0.7 ± 0.4          | 0.7 ± 0.3                        |                       |                       |
| <b>DJF, 2015/16</b> | 5.7 ± 3.5 | 0.6 ± 0.4 | 0.9 ± 0.6                    | 0.7 ± 0.5      | 2.4 ± 1.3                     | 0.9 ± 0.8                    | 9 ± 1.6 | 1.5 ± 0.5                        | 3.9 ± 1.1                         | 1.0 ± 0.2          | 1.1 ± 0.6                        | -20.6 ± 0.9           | -66 ± 55              |
| <b>MAM, 2016</b>    | 2.6 ± 1.1 | 0.2 ± 0.1 | 0.4 ± 0.2                    | 0.1 ± 0.1      | 1.0 ± 0.61                    | 0.2 ± 0.1                    | 18 ± 4  | 2.5 ± 1.1                        | 6.5 ± 3.5                         | 0.7 ± 0.4          | 0.8 ± 0.5                        |                       |                       |

## Supporting Figures

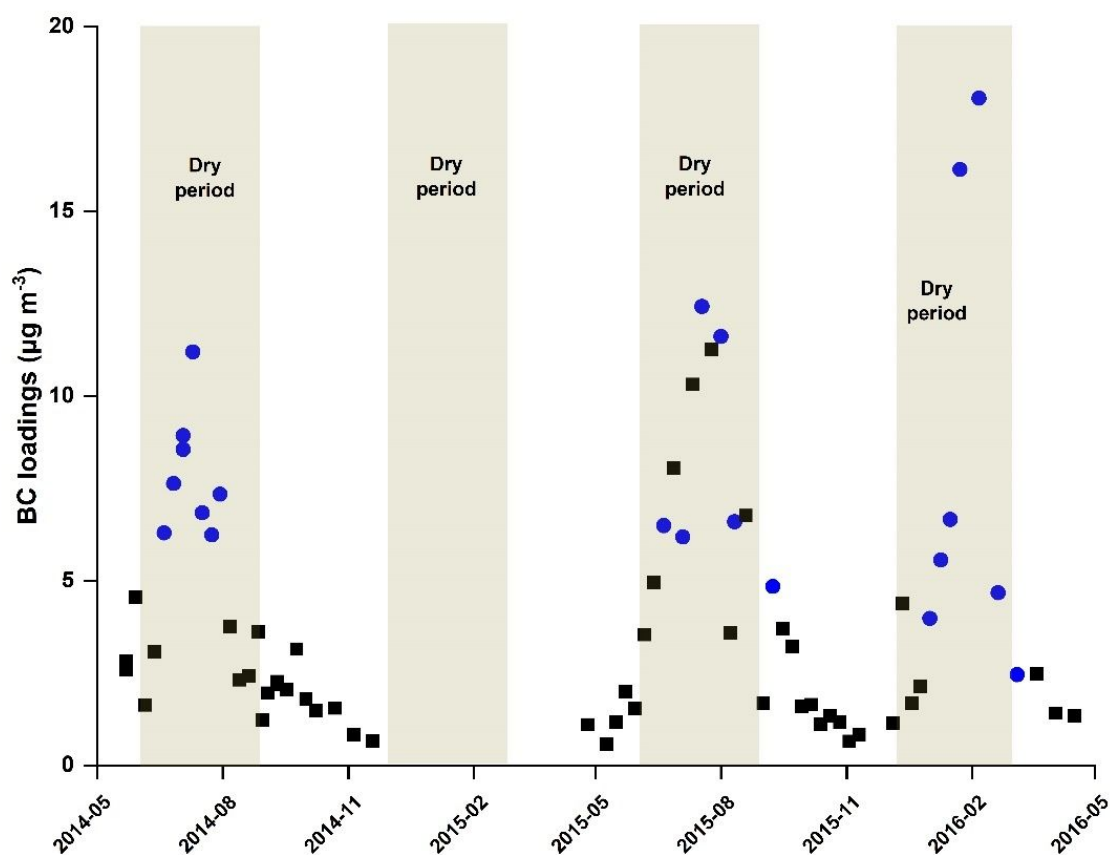

**SI Figure S1:** Sample filter BC loadings – using sunset laboratory thermo-optical instrument - and samples selected for carbon isotopes analyses. Blue circles represent the selected samples for isotope analyses, mainly during the highly BC-loaded dry period (highlighted in greyish colour). Data gap exists between December 2014 and April 2015 due to instrument failure following a lightning strike.

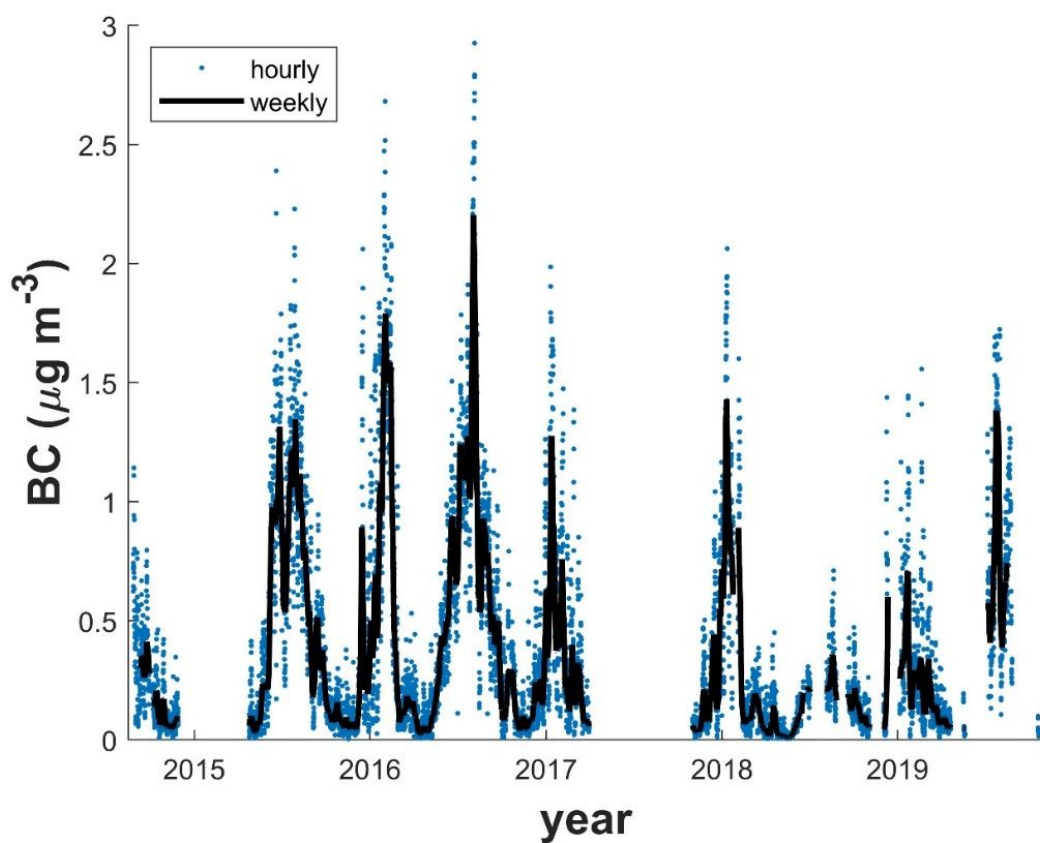

**SI Figure S2:** Hourly (blue dots) and weekly (black trendline) averaged equivalent BC data from an AE33 aethalometer at 880nm. The spikes in the hourly resolution data, potentially from short-term pollution events, were removed following the sliding window algorithm.



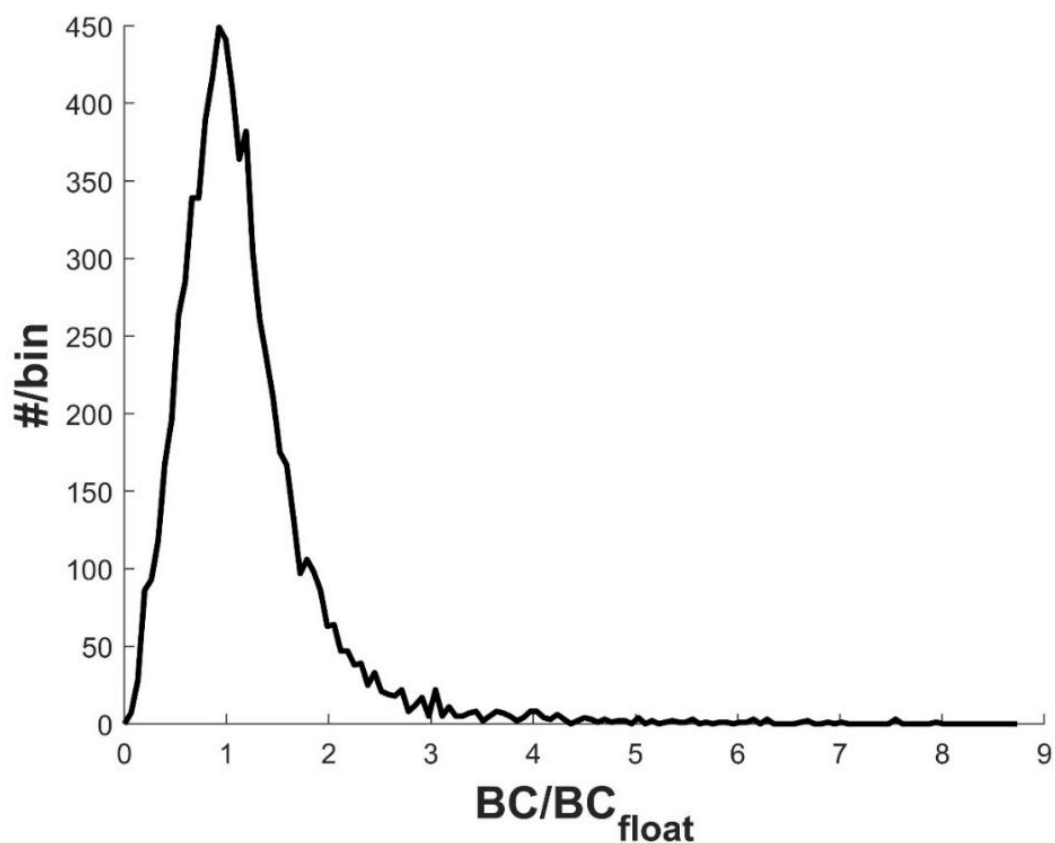

**SI Figure S3:** Histograms of de-trended equivalent BC data (eBC; hourly data divided by weekly floating averages) showing a log-normal concentration distribution. High temporal resolution eBC data was retrieved from an AE33 aethalometer at 880nm.

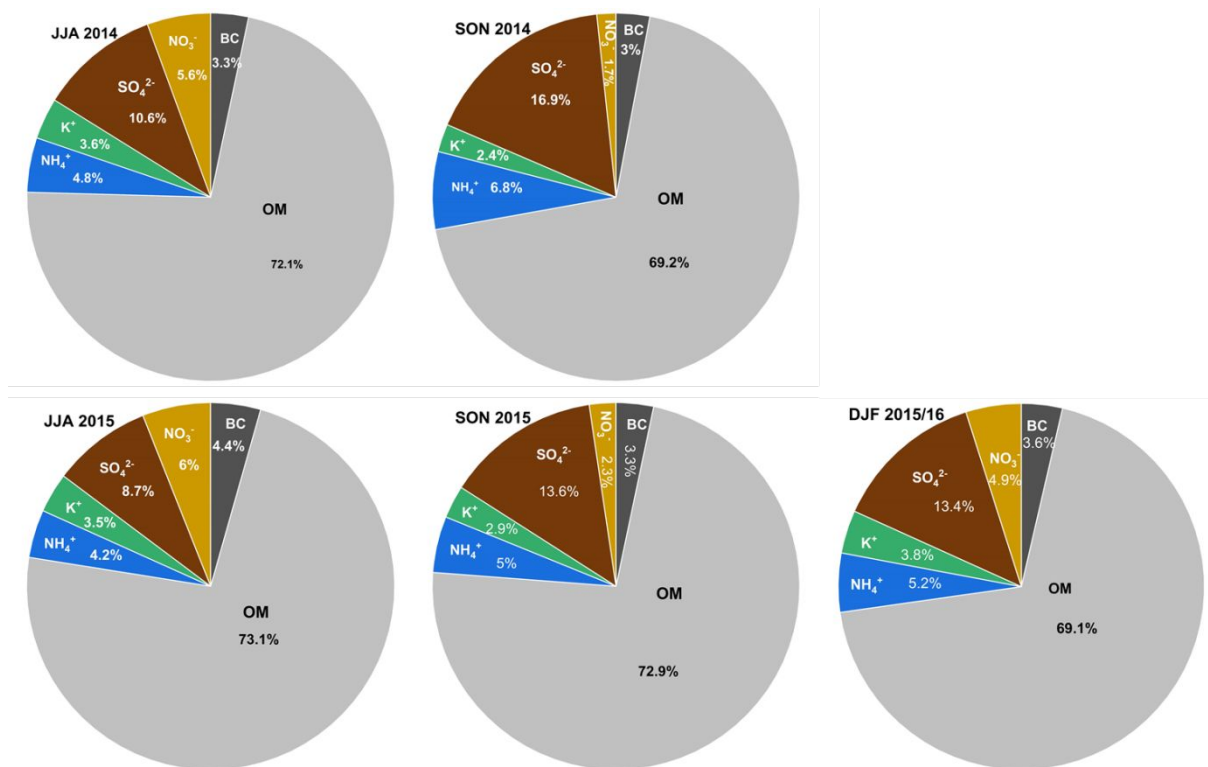

**SI Figure S4:** Seasonal changes in PM<sub>2.5</sub> aerosol composition at the Rwanda climate observatory. June-July-August (JJA) and December-January-February (DJF) are classified as dry periods, while a wet season is experienced between September and November (SON.)

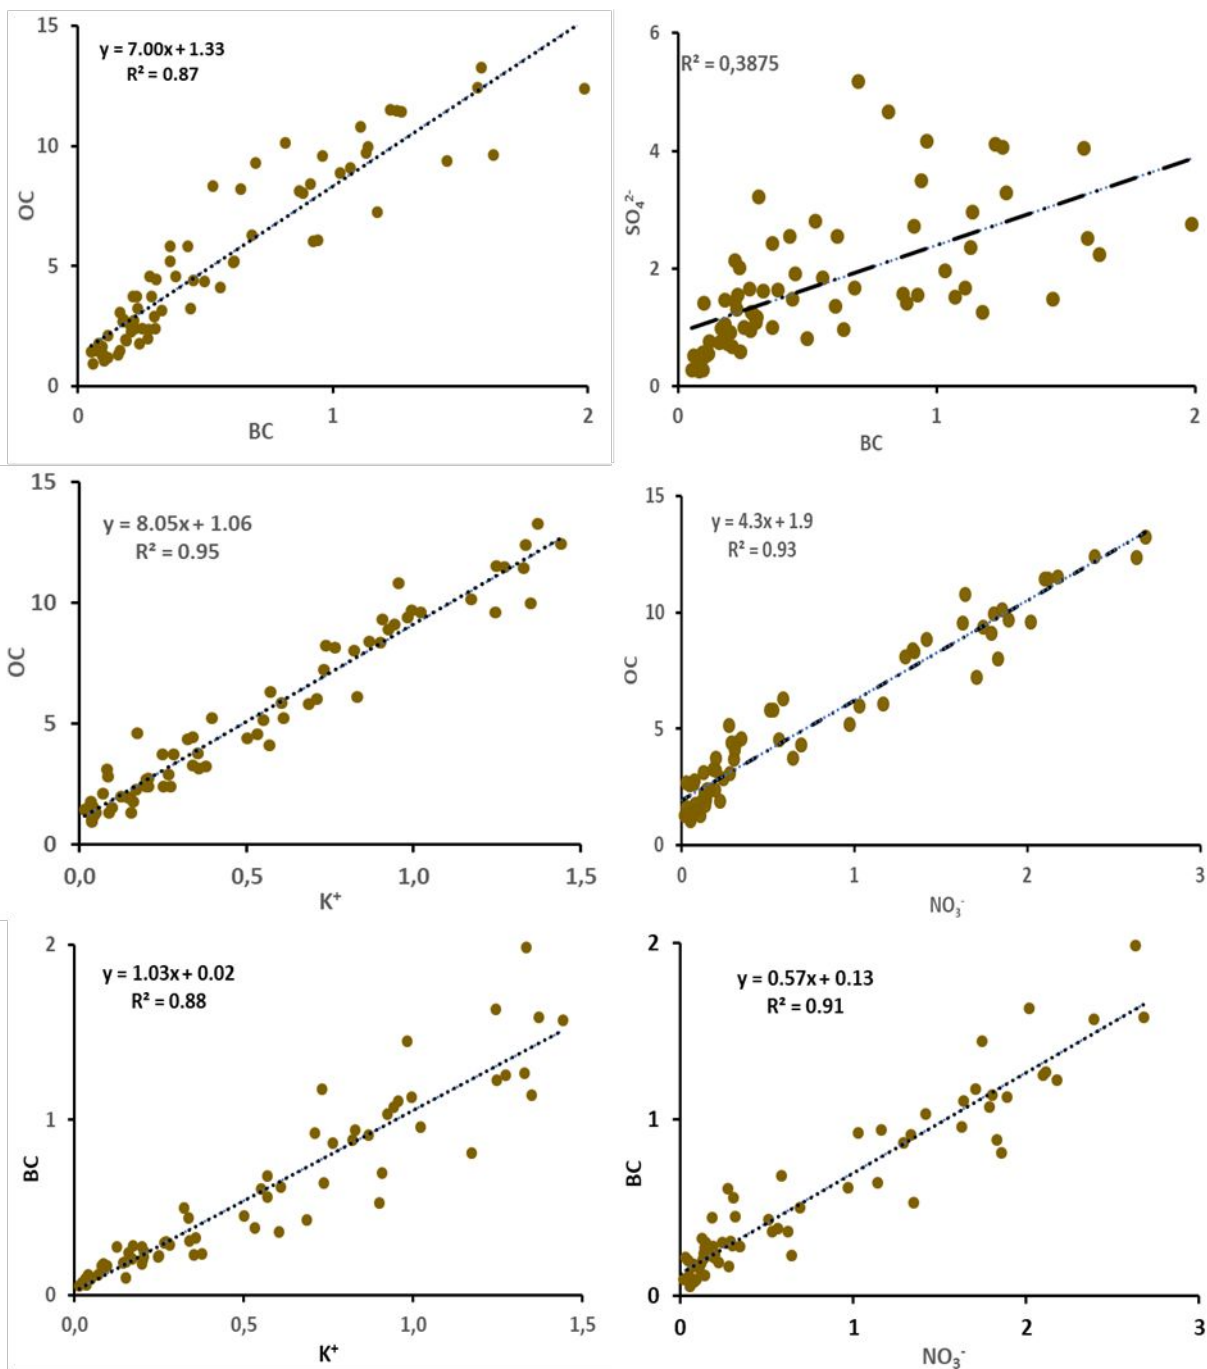

**SI Figure S5:** Correlation between different PM<sub>2.5</sub> components in aerosol samples collected at Rwanda Climate Observatory. Highly correlated BC, OC, NO<sub>3</sub><sup>-</sup> and K<sup>+</sup>, suggest a common emission source profile.

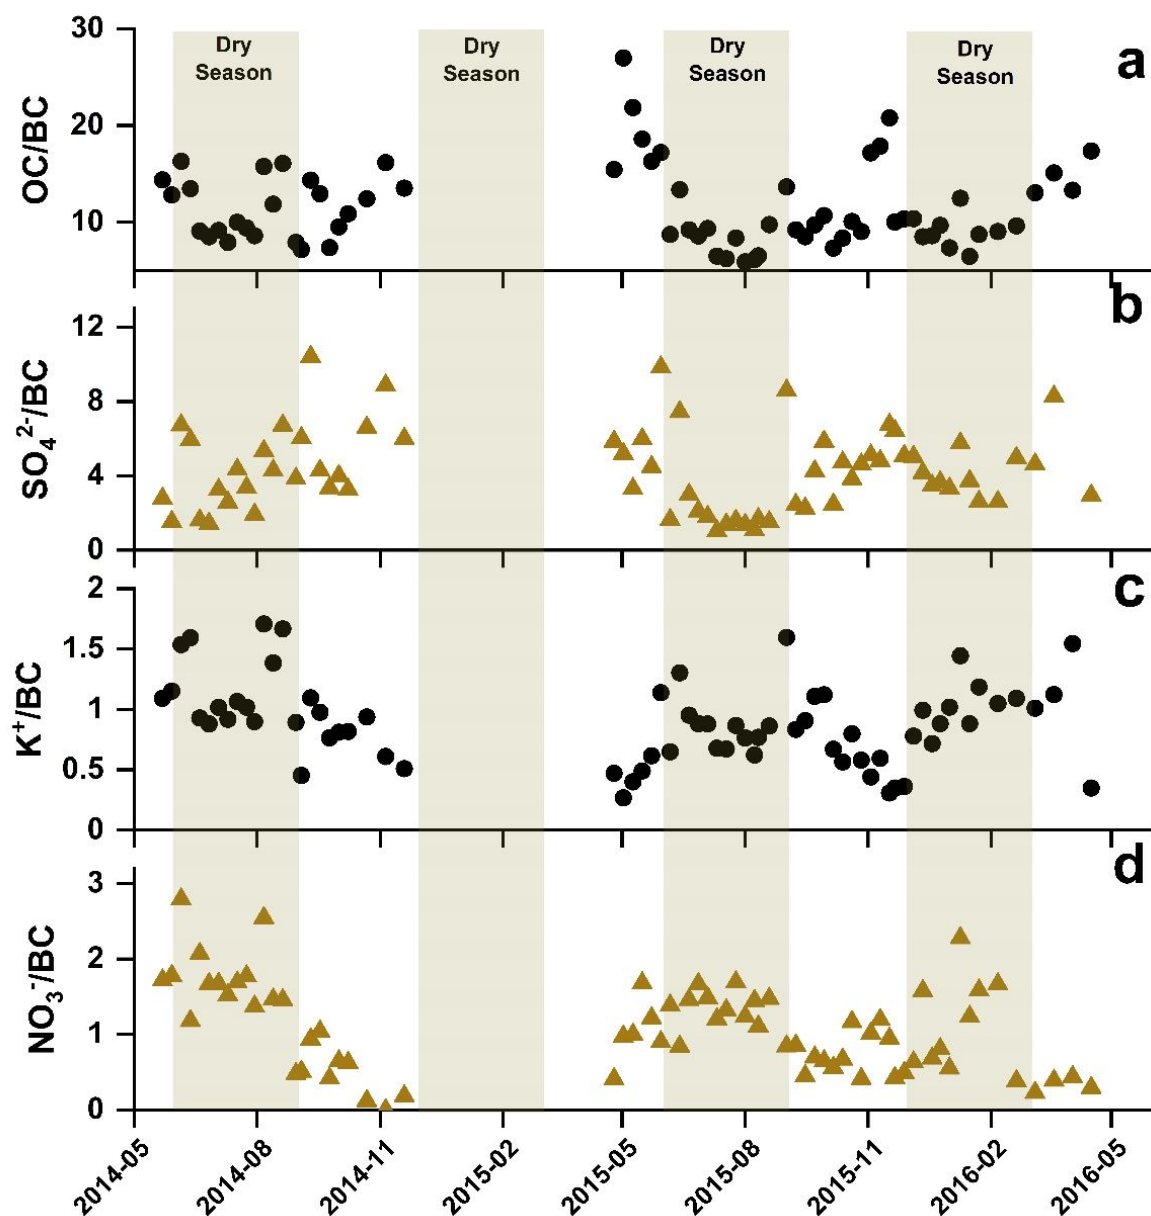

**SI Figure S6:** Temporal trend of different mass ratios relative to BC in PM<sub>2.5</sub> aerosols collected at the Rwanda Climate Observatory between May 2014 and June 2016. Panel (a) shows the OC/BC, panel (b) shows the SO<sub>4</sub><sup>2-</sup>/BC, panel (c) shows the K<sup>+</sup>/BC, and panel (d) shows the NO<sub>3</sub><sup>-</sup>/BC trend. Data gap exists between December 2014 and April 2015 due to instrument failure after a lightning strike. The dry periods are highlighted.

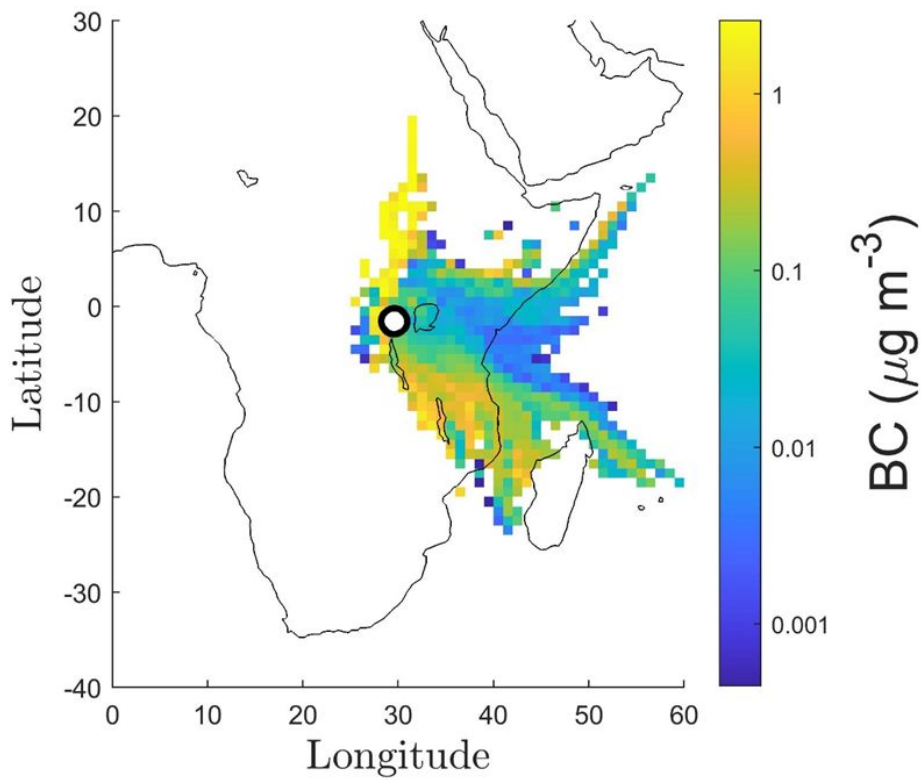

**SI Figure S7:** Visualization of concentration-dependent geographical origins of Black carbon. Black carbon is predominantly of Northeastern origin between December to February, and SouthEastern origin during Boreal summer, overlapping with largescale savanna fire occurrence.

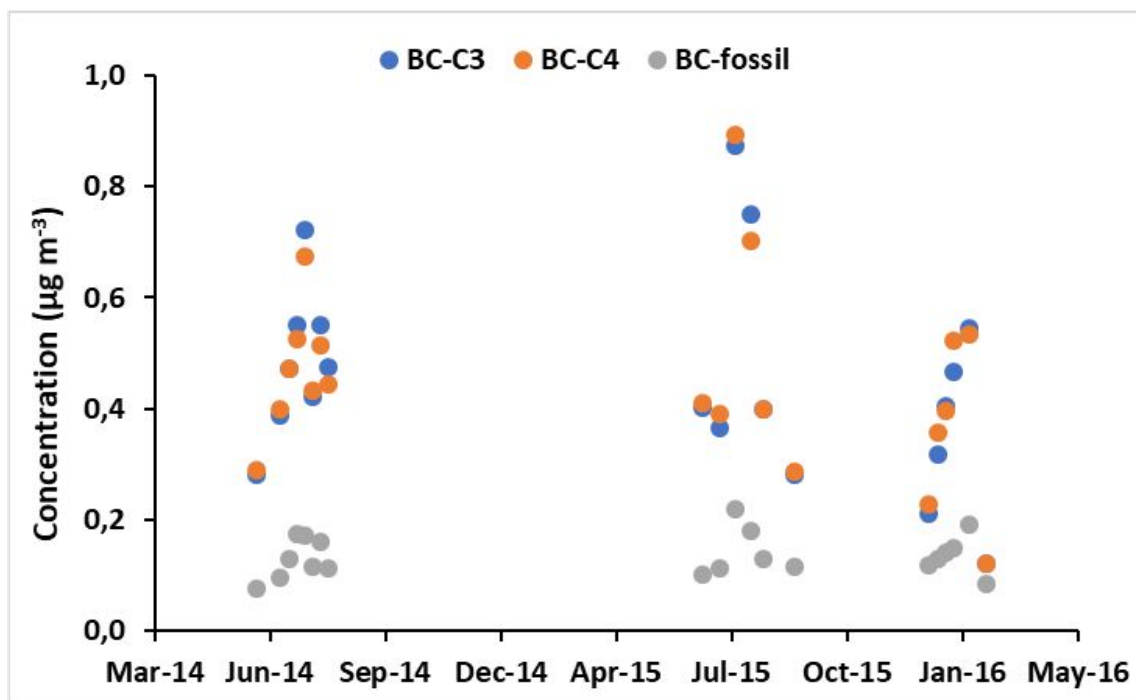

**SI Figure S8:** Dual-carbon ( $\Delta^{14}\text{C}$  and  $\square^{13}\text{C}$ ) isotope-based BC source attribution at Rwanda Climate Observatory. The main sources for carbonaceous aerosols in Eastern Africa are C3 plants, C4 plants, and liquid fossil combustion. The source fractions and their uncertainties were estimated through Markov chain Monte Carlo (MCMC) simulations.

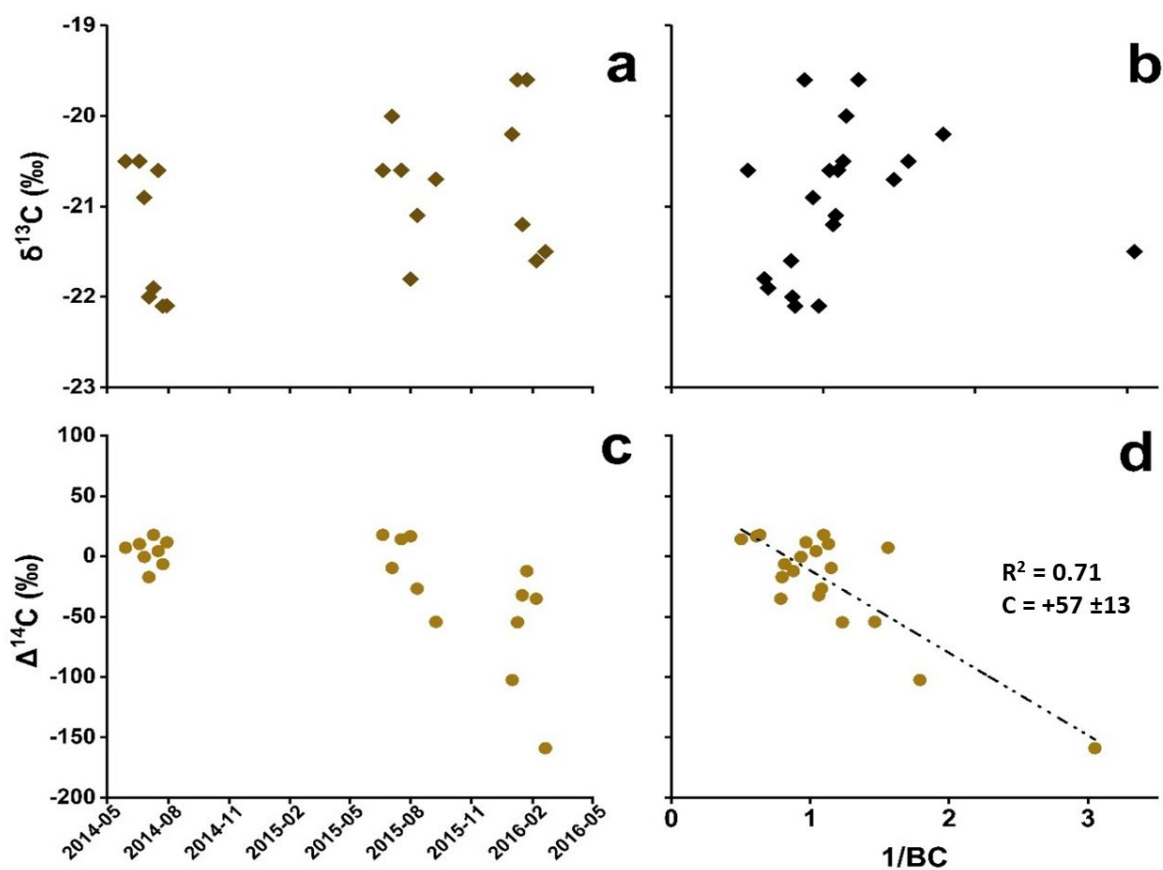

**SI Figure S9:** The dual carbon isotope signatures ( $\Delta^{14}\text{C}$  and  $\delta^{13}\text{C}$ ) of BC, and the respective keeling plots. The time-series for the observed  $\delta^{13}\text{C}_{\text{BC}}$  signatures (a) and  $\Delta^{14}\text{C}_{\text{BC}}$  signatures (b) are presented, in addition to keeling plots, that is, the interrelation between  $\delta^{13}\text{C}_{\text{BC}}$  vs  $1/\text{BC}$  (c) and  $\Delta^{14}\text{C}_{\text{BC}}$  vs  $1/\text{BC}$  (d). Night-time only (01.00 to 06.00h, local time, GMT+3) samples collected during the high free-tropospheric aerosol loading events, June-July-August and December-January-February, were analyzed for carbon isotopes. The y-intercept in the keeling plot depicts the background BC source signature.

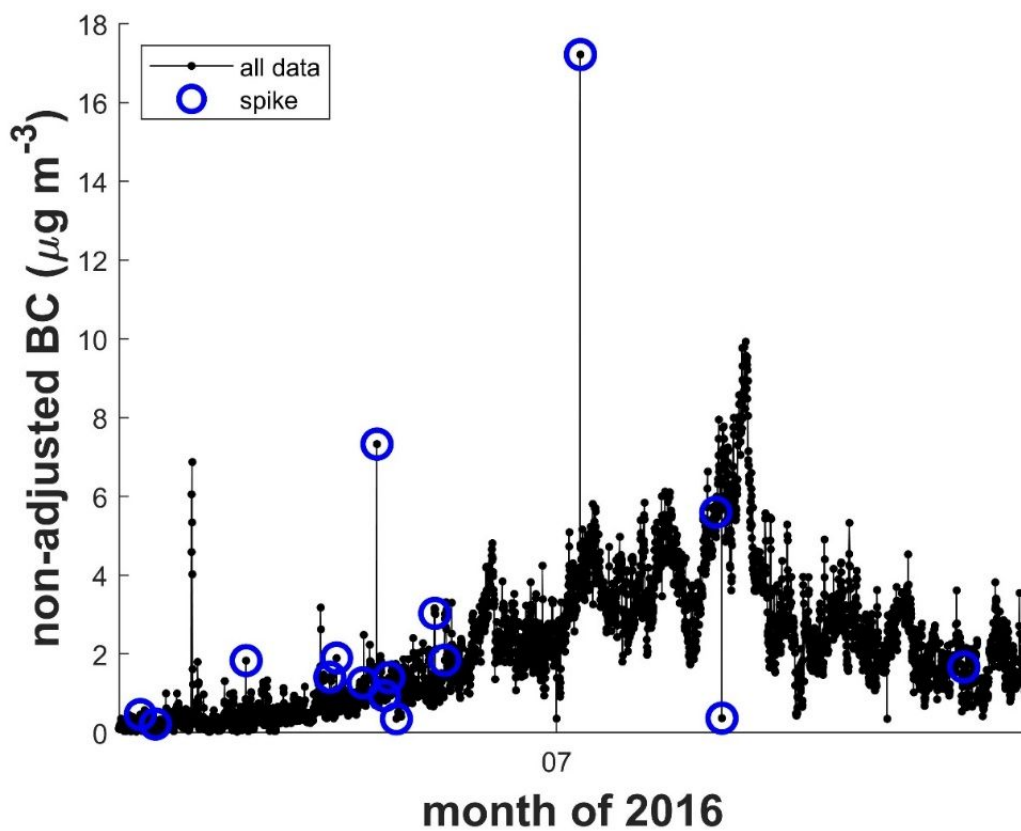

**SI Figure S10:** Illustration of spike-detection (blue circles) of the hourly resolution BC data from the aethalometer. The spikes in the hourly data potentially from short-term pollution events were removed by the following sliding window algorithm as described in SI Notes S1.



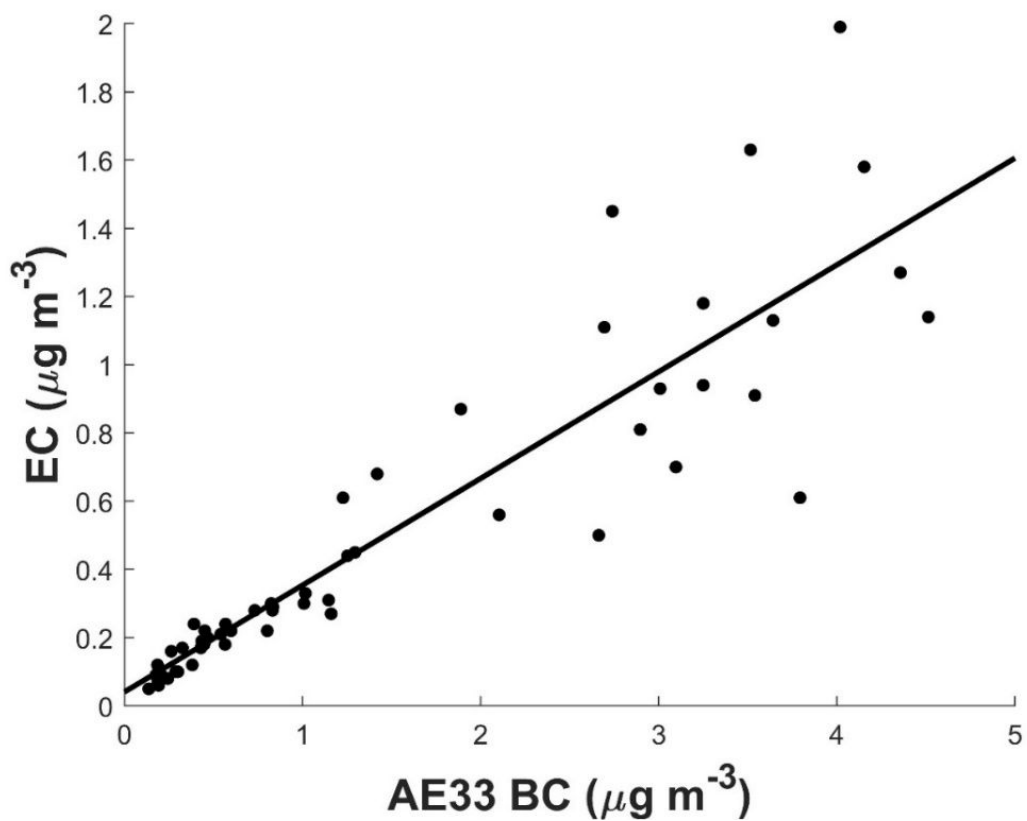

**SI Figure S11:** Correlation between eBC estimates from the AE33 aethalometer and sunset laboratory thermo-optical BC data. The aethalometer measurements were over-estimated by a factor of 3.2, possibly due to absorption enhancement of the aged plumes intercepted at Rwanda Climate Observatory.

## References

- (1) Drinovec, L.; Močnik, G.; Zotter, P.; Prévôt, A. S. H.; Ruckstuhl, C.; Coz, E.; Rupakheti, M.; Sciare, J.; Müller, T.; Wiedensohler, A.; Hansen, A. D. A. The “Dual-Spot” Aethalometer: An Improved Measurement of Aerosol Black Carbon with Real-Time Loading Compensation. *Atmos. Meas. Tech.* **2015**, *8* (5), 1965–1979. <https://doi.org/10.5194/amt-8-1965-2015>.
- (2) Weingartner, E.; Saathoff, H.; Schnaiter, M.; Streit, N.; Bitnar, B.; Baltensperger, U. Absorption of Light by Soot Particles: Determination of the Absorption Coefficient by Means of Aethalometers. *J. Aerosol Sci.* **2003**, *34* (10), 1445–1463. [https://doi.org/10.1016/S0021-8502\(03\)00359-8](https://doi.org/10.1016/S0021-8502(03)00359-8).
- (3) Schmid, O.; Artaxo, P.; Arnott, W. P.; Chand, D.; Gatti, L. V.; Frank, G. P.; Hoffer, A.; Schnaiter, M.; Andreae, M. O. Spectral Light Absorption by Ambient Aerosols Influenced by Biomass Burning in the Amazon Basin. I: Comparison and Field Calibration of Absorption Measurement Techniques. *Atmos. Chem. Phys.* **2006**, *6* (11), 3443–3462. <https://doi.org/10.5194/acp-6-3443-2006>.
- (4) Bond, T. C.; Doherty, S. J.; Fahey, D. W.; Forster, P. M.; Berntsen, T.; Deangelo, B. J.; Flanner, M. G. et al. Bounding the Role of Black Carbon in the Climate System: A Scientific Assessment. *J. Geophys. Res. Atmos.* **2013**, *118* (11), 5380–5552. <https://doi.org/10.1002/jgrd.50171>.
- (5) Laing, J. R.; Jaffe, D. A.; Sedlacek, A. J. Comparison of Filter-Based Absorption Measurements of Biomass Burning Aerosol and Background Aerosol at the Mt. Bachelor Observatory. *Aerosol Air Qual. Res.* **2020**, *20* (4), 663–678. <https://doi.org/10.4209/aaqr.2019.06.0298>.
- (6) Blanchard, D. C.; Woodcock, A. H. The Production, Concentration, and Vertical Distribution of the Sea-Salt Aerosol. *Ann. New York Acad. Sci.* **1980**, No. 954, 330–347.
- (7) Millero, F. J.; Feistel, R.; Wright, D. G.; McDougall, T. J. The Composition of Standard Seawater and the Definition of the Reference-Composition Salinity Scale. *Deep. Res. Part I Oceanogr. Res. Pap.* **2008**, *55* (1), 50–72. <https://doi.org/10.1016/j.dsr.2007.10.001>.
